# Supplementary material for: Low-crystalline mesoporous CoFe2O4/C composite with oxygen vacancies for high energy density asymmetric supercapacitors
Source: Royal Society of Chemistry journal article supplement (doi:10.1039/c7ra11741h), 2017-01-01
Supplement: c7ra11741h1.pdf [file c7ra11741h1.pdf]

## ***Supporting Information***

### **Low-Crystalline Mesoporous CoFe<sub>2</sub>O<sub>4</sub>/C Composite with Oxygen Vacancies for High Performance Asymmetric Supercapacitor**

Yan Zhao,<sup>1</sup> Yuanguo Xu,<sup>1</sup> Jie Zeng,<sup>2</sup> Biao Kong,<sup>2\*</sup> Xiwen Geng,<sup>3</sup> Dongwei Li,<sup>3</sup> Xiang Gao,<sup>3</sup> Kang Liang,<sup>4</sup> Le Xu,<sup>1</sup> Jiabiao Lian,<sup>1</sup> Shuquan Huang,<sup>1</sup> Jingxia Qiu,<sup>1</sup> Yunpeng Huang,<sup>1</sup> and Huaming Li<sup>1\*</sup>

*<sup>1</sup>Institute for Energy Research, Jiangsu University, Zhenjiang 212013, PR China*

*<sup>2</sup>Department of Chemistry, Shanghai Key Lab of Molecular Catalysis and Innovative Materials, iChEM, Fudan University, Shanghai 200433, PR China*

*<sup>3</sup>National Supercomputer Research Center of Advanced Materials, Advanced Materials Institute, Shandong Academy of Sciences, Jinan 250014, P. R. China*

*<sup>4</sup>School of Chemical Engineering, The University of New South Wales, Sydney, NSW 2052, Australia*

\*Corresponding authors:

Biao Kong (B.K.); Huaming Li (H.M.L.)

Email addresses:

*bkong@fudan.edu.cn; lhm@ujs.edu.cn*

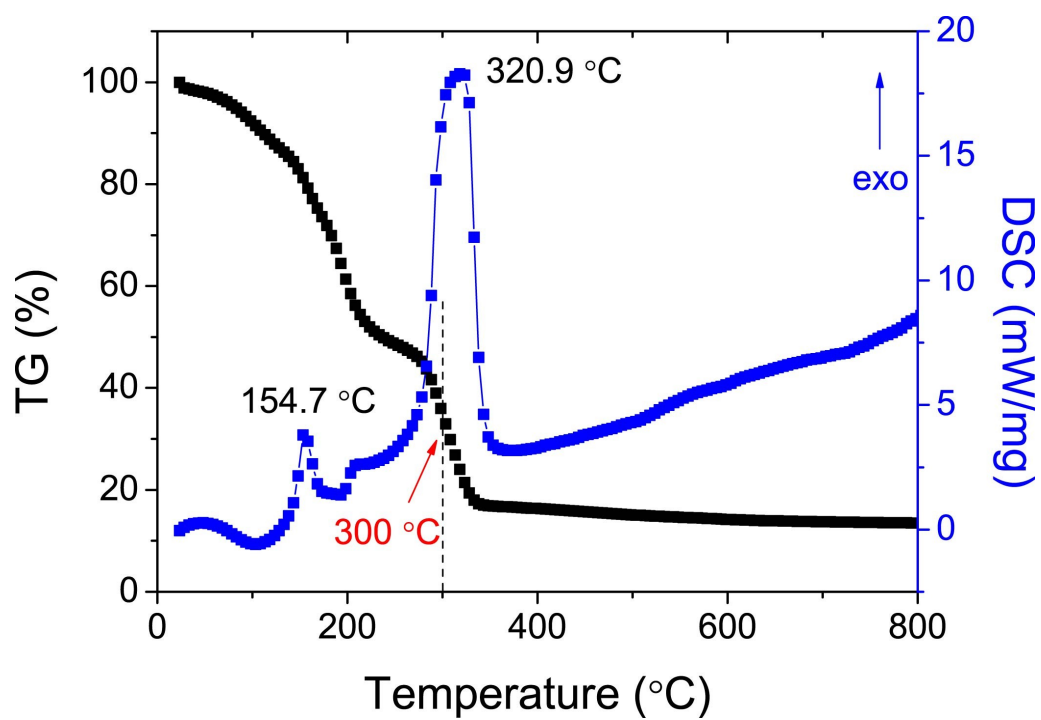

Fig. S1. TG and DSC analysis of mesoporous L-CoFe<sub>2</sub>O<sub>4</sub>/C composite

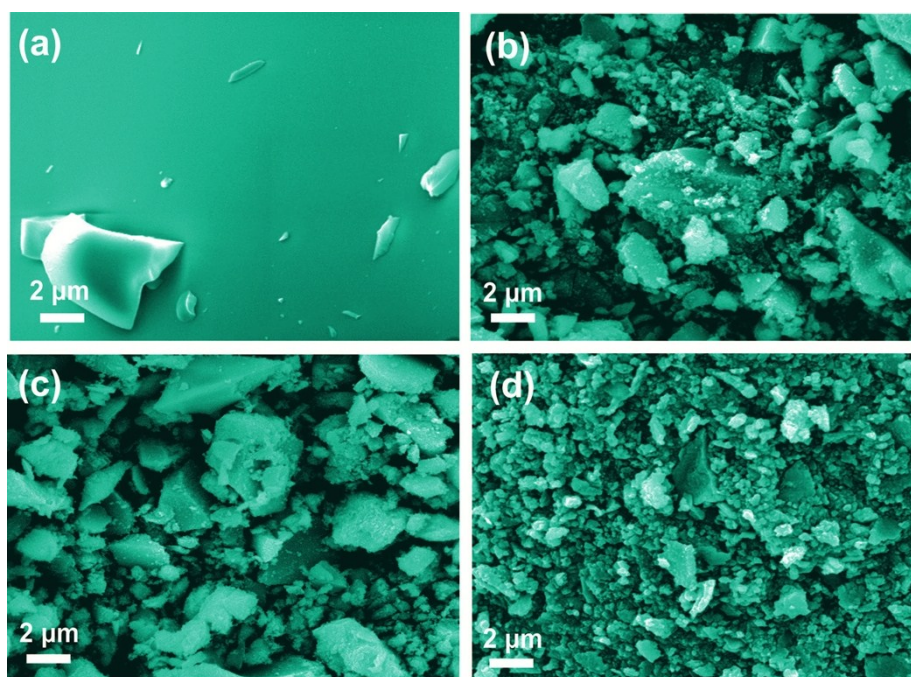

Fig. S2. The SEM images of (a) CoFe-Precursor, (b) Mesoporous L-CoFe<sub>2</sub>O<sub>4</sub>/C, (c) CoFe<sub>2</sub>O<sub>4</sub>-400 and (d) CoFe<sub>2</sub>O<sub>4</sub>-700 samples.

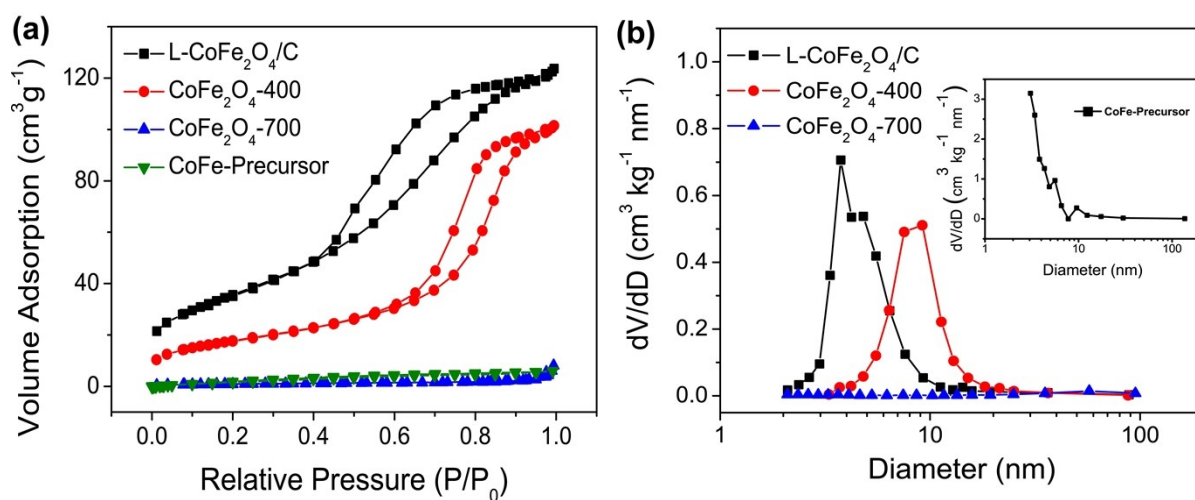

Fig. S3. (a) Nitrogen adsorption-desorption isotherms of CoFe-Precursor, mesoporous L-CoFe<sub>2</sub>O<sub>4</sub>/C composite, CoFe<sub>2</sub>O<sub>4</sub>-400 and CoFe<sub>2</sub>O<sub>4</sub>-700 samples and (b) the related pore size distribution, calculated from the adsorption isotherms using a DFT method.

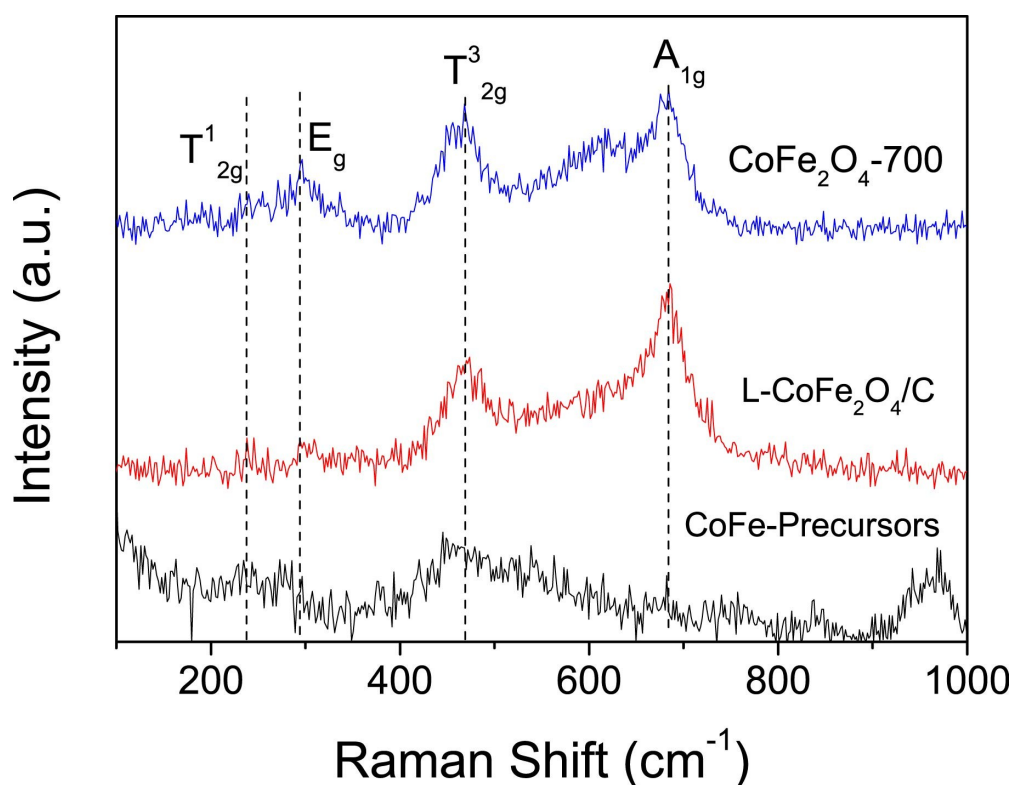

Fig. S4. Raman spectra of CoFe-Precursor, Mesoporous L-CoFe<sub>2</sub>O<sub>4</sub>/C composite and CoFe<sub>2</sub>O<sub>4</sub>-700.

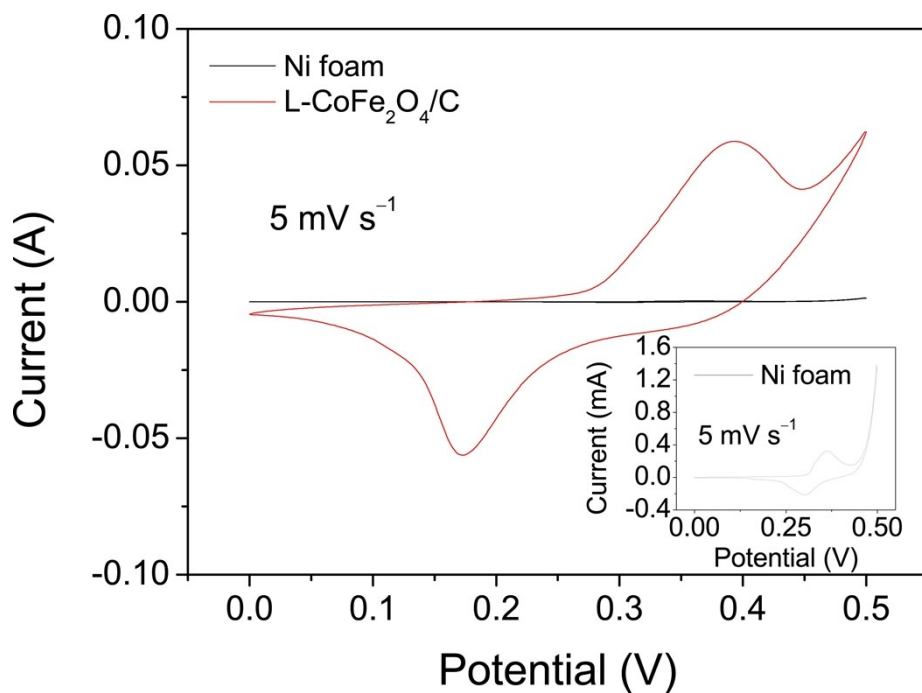

Fig. S5. CV curves of mesoporous L-CoFe<sub>2</sub>O<sub>4</sub>/C and Ni foam electrodes in a potential range of 0 to 0.5 V at a scan rate of 5 mV s<sup>-1</sup>.

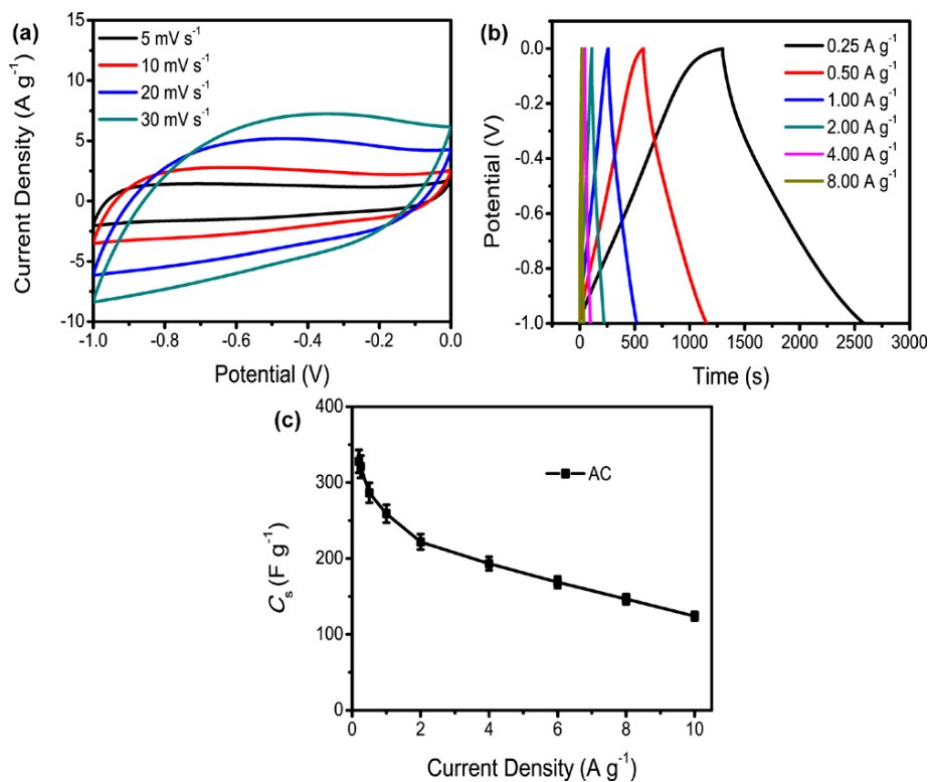

Fig. S6. a) CV curves of the AC electrode at different scan rates. b) Galvanostatic charge–discharge curves. c)  $C_s$  of AC electrode at different current densities.

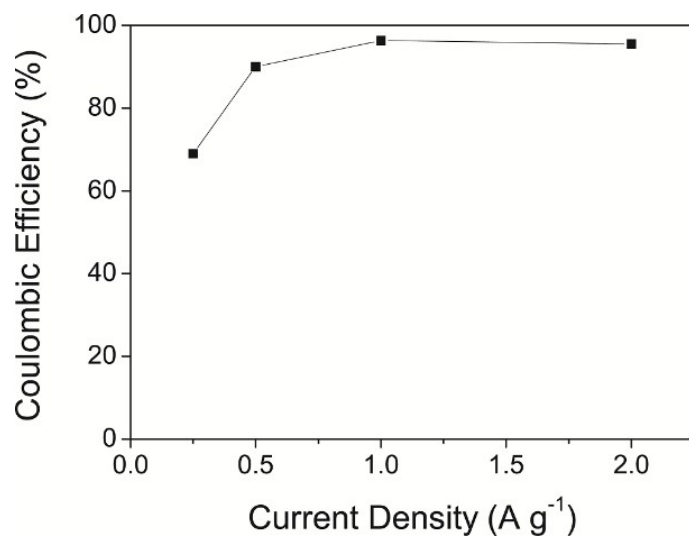

Fig. S7. Coulombic efficiency of L-CoFe<sub>2</sub>O<sub>4</sub>/C//AC asymmetric supercapacitor at different current densities.

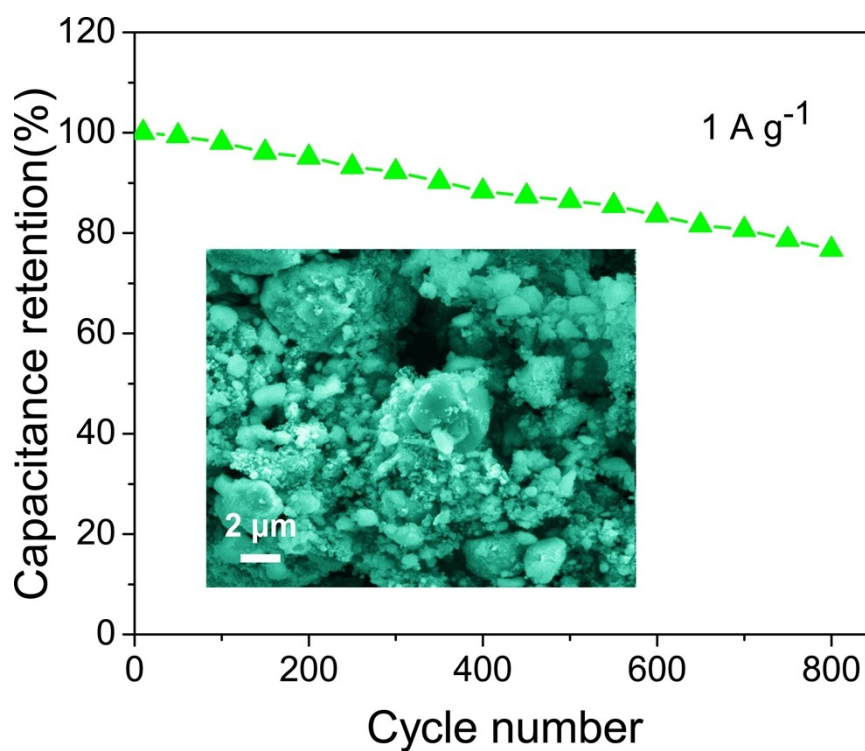

Fig. S8. Cycle stability of L-CoFe<sub>2</sub>O<sub>4</sub>/C//AC asymmetric supercapacitor at a current density of 1 A g<sup>-1</sup>.

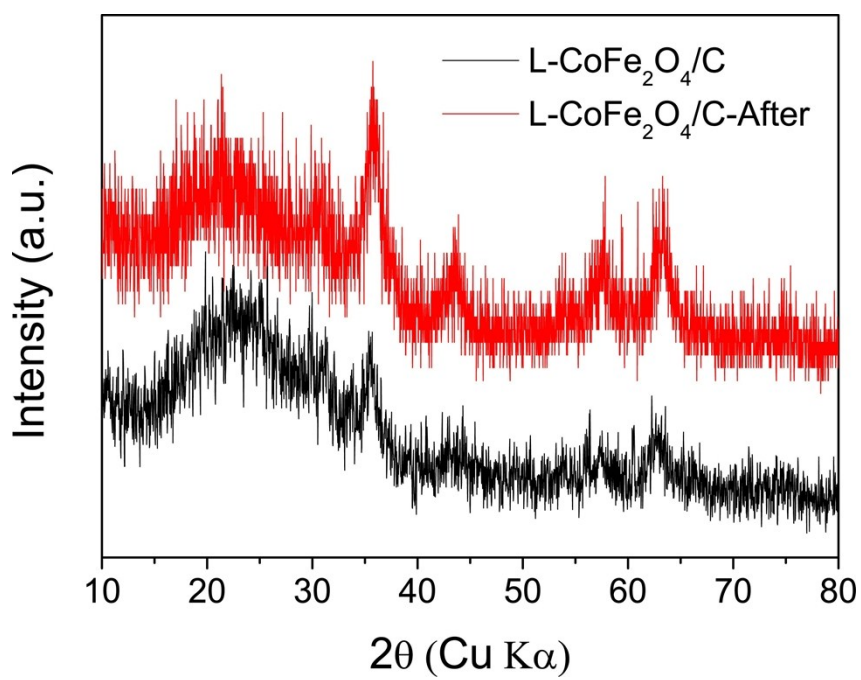

Fig. S9. XRD patterns of mesoporous L-CoFe<sub>2</sub>O<sub>4</sub>/C composite before and after 800 cycles charging/discharging process.
